# Supplementary material for: The Effect of Group Support Psychotherapy Delivered by Trained Lay Health Workers for Depression Treatment Among People with HIV in Uganda: Protocol of a Pragmatic, Cluster Randomized Trial
Source: PubMed Central journal article supplement (PMC5742658; doi:10.2196/resprot.8925), 2017-12-11
Supplement: resprot_v6i12e250_app3.pdf [file resprot_v6i12e250_app3.pdf]

| <b>Competency Domain</b>                                                             | <b>Knowledge</b>                                                                                                                                                      | <b>Skills</b>                                                                                                                      | <b>Attitudes</b>                                                                                                                                                                 |
|--------------------------------------------------------------------------------------|-----------------------------------------------------------------------------------------------------------------------------------------------------------------------|------------------------------------------------------------------------------------------------------------------------------------|----------------------------------------------------------------------------------------------------------------------------------------------------------------------------------|
| Able to initiate contact and build rapport with a depressed PLWH                     | Describes basic communication skills required for effective counseling                                                                                                | Applies principles of active and reflective listening skills, expressing empathy and establishing rapport                          | Expresses a positive manner of relating to others by being warm and nonjudgmental, and showing respect for people and their differences (e.g. ethnic, age-related, or political) |
| Able to conduct brief assessment and triage                                          | Defines characteristics of mild-moderate versus severe depression                                                                                                     | Gives health talks on depression and performs screening to distinguish between mild-moderate versus severe depression              | Reports that the screening is useful to discern between mild-moderate versus severe depression                                                                                   |
| Able to deliver GSP following the Intervention Manual                                | Describes the importance of mitigating depression and enhancing positive coping and income generating abilities                                                       | Demonstrates techniques for mitigating depression and enhancing positive coping and income generating abilities                    | Expresses confidence in ability to mitigate suicidal ideation and promote positive coping, problem solving, and income generating skills.                                        |
| Able to practice self-awareness and self-care (a prerequisite for caring for others) | Identifies at least 5 possible signs of personal stress, and knows at least 5 self-care principles and practices such as proper nutrition, exercise and sleep hygiene | Applies appropriate techniques for maintaining awareness of possible signs of personal stress, and for using self-care principles. | Able to stay calm and confidently address strong release of emotions during group sessions.<br>Able to manage personal stress, by using self-care principles.                    |
